# Supplementary material for: Egyptian Pediatric Guidelines for the Management of Children with Isolated Thrombocytopenia Using the Adapted ADAPTE Methodology—A Limited-Resource Country Perspective
Source: MDPI journal article supplement (doi:10.3390/children11040452), 2024-04-09
Supplement: s1 [file s1]

**Table S1. The RIGHT-Ad@pt checklist**

| 7 sections, 27 topics, and 34 items                          |                                                                                                                                                                                                                | Assessment                                                                                                 | Page(s)* | Note(s) |
|--------------------------------------------------------------|----------------------------------------------------------------------------------------------------------------------------------------------------------------------------------------------------------------|------------------------------------------------------------------------------------------------------------|----------|---------|
| <b>BASIC INFORMATION</b>                                     |                                                                                                                                                                                                                |                                                                                                            |          |         |
| <b>Title/subtitle</b>                                        |                                                                                                                                                                                                                |                                                                                                            |          |         |
| 1                                                            | Identify the report as an adaptation of practice guideline(s), that is include "guideline adaptation", "adapting", "adapted guideline/recommendation(s)", or similar terminology in the title/subtitle.        | <input checked="" type="checkbox"/> Yes<br><input type="checkbox"/> No<br><input type="checkbox"/> Unclear |          |         |
| 2                                                            | Describe the topic/focus/scope of the adapted guideline.                                                                                                                                                       | <input checked="" type="checkbox"/> Yes<br><input type="checkbox"/> No<br><input type="checkbox"/> Unclear |          |         |
| <b>Cover/first page</b>                                      |                                                                                                                                                                                                                |                                                                                                            |          |         |
| 3                                                            | Report the respective dates of publication and the literature search of the adapted guideline.                                                                                                                 | <input checked="" type="checkbox"/> Yes<br><input type="checkbox"/> No<br><input type="checkbox"/> Unclear |          |         |
| 4                                                            | Describe the developer and country/region of the adapted guideline.                                                                                                                                            | <input checked="" type="checkbox"/> Yes<br><input type="checkbox"/> No<br><input type="checkbox"/> Unclear |          |         |
| <b>Executive summary/abstract</b>                            |                                                                                                                                                                                                                |                                                                                                            |          |         |
| 5                                                            | Provide a summary of the recommendations contained in the adapted guideline.                                                                                                                                   | <input checked="" type="checkbox"/> Yes<br><input type="checkbox"/> No<br><input type="checkbox"/> Unclear |          |         |
| <b>Abbreviations and acronyms</b>                            |                                                                                                                                                                                                                |                                                                                                            |          |         |
| 6                                                            | Define key terms and provide a list of abbreviations and acronyms (if applicable).                                                                                                                             | <input checked="" type="checkbox"/> Yes<br><input type="checkbox"/> No<br><input type="checkbox"/> Unclear |          |         |
| <b>Contact information of the guideline adaptation group</b> |                                                                                                                                                                                                                |                                                                                                            |          |         |
| 7                                                            | Report the contact information of the developer of the adapted guideline.                                                                                                                                      | <input checked="" type="checkbox"/> Yes<br><input type="checkbox"/> No<br><input type="checkbox"/> Unclear |          |         |
| <b>SCOPE</b>                                                 |                                                                                                                                                                                                                |                                                                                                            |          |         |
| <b>Source guideline(s)</b>                                   |                                                                                                                                                                                                                |                                                                                                            |          |         |
| 8                                                            | Report the name and year of publication of the source guideline(s), provide the citation(s), and whether source authors were contacted.                                                                        | <input checked="" type="checkbox"/> Yes<br><input type="checkbox"/> No<br><input type="checkbox"/> Unclear |          |         |
| <b>Brief description of the health problem(s)</b>            |                                                                                                                                                                                                                |                                                                                                            |          |         |
| 9                                                            | Provide the basic epidemiological information about the problem (including the associated burden), health systems relevant issues, and note any relevant differences compared to the source guideline(s).      | <input checked="" type="checkbox"/> Yes<br><input type="checkbox"/> No<br><input type="checkbox"/> Unclear |          |         |
| <b>Aim(s) and specific objectives</b>                        |                                                                                                                                                                                                                |                                                                                                            |          |         |
| 10                                                           | Describe the aim(s) of the adapted guideline and specific objectives, and note any relevant differences compared to the source guideline(s).                                                                   | <input checked="" type="checkbox"/> Yes<br><input type="checkbox"/> No<br><input type="checkbox"/> Unclear |          |         |
| <b>Target population(s)</b>                                  |                                                                                                                                                                                                                |                                                                                                            |          |         |
| 11                                                           | Describe the target population(s) and subgroup(s) (if applicable) to which the recommendation(s) is addressed in the adapted guideline, and note any relevant differences compared to the source guideline(s). | <input checked="" type="checkbox"/> Yes<br><input type="checkbox"/> No<br><input type="checkbox"/> Unclear |          |         |
| <b>End-users and settings</b>                                |                                                                                                                                                                                                                |                                                                                                            |          |         |
| 12                                                           | Describe the intended target users of the adapted guideline, and note any relevant differences compared to the source guideline(s).                                                                            | <input checked="" type="checkbox"/> Yes<br><input type="checkbox"/> No<br><input type="checkbox"/> Unclear |          |         |
| 13                                                           | Describe the setting(s) for which the adapted guideline is intended, and note any relevant differences compared to the source guideline(s).                                                                    | <input checked="" type="checkbox"/> Yes<br><input type="checkbox"/> No<br><input type="checkbox"/> Unclear |          |         |

| 7 sections, 27 topics, and 34 items                                                       |                                                                                                                                                                                                                                   | Assessment                                                                                                 | Page(s)* | Note(s) |
|-------------------------------------------------------------------------------------------|-----------------------------------------------------------------------------------------------------------------------------------------------------------------------------------------------------------------------------------|------------------------------------------------------------------------------------------------------------|----------|---------|
| <b>RIGOR OF DEVELOPMENT</b>                                                               |                                                                                                                                                                                                                                   |                                                                                                            |          |         |
| <b>Guideline adaptation group</b>                                                         |                                                                                                                                                                                                                                   |                                                                                                            |          |         |
| 14                                                                                        | List all contributors to the guideline adaptation process and describe their selection process and responsibilities.                                                                                                              | <input checked="" type="checkbox"/> Yes<br><input type="checkbox"/> No<br><input type="checkbox"/> Unclear |          |         |
| <b>Adaptation framework/methodology</b>                                                   |                                                                                                                                                                                                                                   |                                                                                                            |          |         |
| 15                                                                                        | Report which framework or methodology was used in the guideline adaptation process.                                                                                                                                               | <input checked="" type="checkbox"/> Yes<br><input type="checkbox"/> No<br><input type="checkbox"/> Unclear |          |         |
| <b>Source guideline(s)</b>                                                                |                                                                                                                                                                                                                                   |                                                                                                            |          |         |
| 16                                                                                        | Describe how the specific source guideline(s) was(were) selected.                                                                                                                                                                 | <input checked="" type="checkbox"/> Yes<br><input type="checkbox"/> No<br><input type="checkbox"/> Unclear |          |         |
| <b>Key questions</b>                                                                      |                                                                                                                                                                                                                                   |                                                                                                            |          |         |
| 17                                                                                        | State the key questions of the adapted guideline using a structured format, such as PICO (population, intervention, comparator, and outcome), or another format as appropriate.                                                   | <input checked="" type="checkbox"/> Yes<br><input type="checkbox"/> No<br><input type="checkbox"/> Unclear |          |         |
| 18                                                                                        | Describe how the key questions were developed/modified, and/or prioritized.                                                                                                                                                       | <input type="checkbox"/> Yes<br><input checked="" type="checkbox"/> No<br><input type="checkbox"/> Unclear |          |         |
| <b>Source recommendation(s)</b>                                                           |                                                                                                                                                                                                                                   |                                                                                                            |          |         |
| 19                                                                                        | Describe how the recommendation(s) from the source guideline(s) was(were) assessed with respect to the evidence considered for the different criteria, the judgements and considerations made by the original panel.              | <input type="checkbox"/> Yes<br><input checked="" type="checkbox"/> No<br><input type="checkbox"/> Unclear |          |         |
| <b>Evidence synthesis</b>                                                                 |                                                                                                                                                                                                                                   |                                                                                                            |          |         |
| 20                                                                                        | Indicate whether the adapted recommendation(s) is/are based on existing evidence from the source guideline(s), and/or additional evidence.                                                                                        | <input checked="" type="checkbox"/> Yes<br><input type="checkbox"/> No<br><input type="checkbox"/> Unclear |          |         |
| 21                                                                                        | If new research evidence was used, describe how it was identified and assessed.                                                                                                                                                   | <input type="checkbox"/> Yes<br><input checked="" type="checkbox"/> No<br><input type="checkbox"/> Unclear | NA       |         |
| <b>Assessment of the certainty of the body of evidence and strength of recommendation</b> |                                                                                                                                                                                                                                   |                                                                                                            |          |         |
| 22                                                                                        | Describe the approach used to assess the certainty/quality of the body/ies of evidence and the strength of recommendations in the adapted guideline and note any differences (if applicable) compared to the source guideline(s). | <input type="checkbox"/> Yes<br><input checked="" type="checkbox"/> No<br><input type="checkbox"/> Unclear | NA       |         |
| <b>Decision-making processes</b>                                                          |                                                                                                                                                                                                                                   |                                                                                                            |          |         |
| 23                                                                                        | Describe the processes used by the guideline adaptation group to make decisions, particularly the formulation of recommendations.                                                                                                 | <input checked="" type="checkbox"/> Yes<br><input type="checkbox"/> No<br><input type="checkbox"/> Unclear |          |         |
| <b>RECOMMENDATIONS</b>                                                                    |                                                                                                                                                                                                                                   |                                                                                                            |          |         |
| <b>Recommendations</b>                                                                    |                                                                                                                                                                                                                                   |                                                                                                            |          |         |
| 24                                                                                        | Report recommendations and indicate whether they were adapted, adopted, or <i>de novo</i> .                                                                                                                                       | <input checked="" type="checkbox"/> Yes<br><input type="checkbox"/> No<br><input type="checkbox"/> Unclear |          |         |
| 25                                                                                        | Indicate the direction and strength of the recommendations and the certainty/quality of the supporting evidence and note any differences compared to the source recommendations(s) (if applicable).                               | <input checked="" type="checkbox"/> Yes<br><input type="checkbox"/> No<br><input type="checkbox"/> Unclear |          |         |
| 26                                                                                        | Present separate recommendations for important subgroups if the evidence suggests important differences in factors influencing recommendations and                                                                                | <input checked="" type="checkbox"/> Yes<br><input type="checkbox"/> No<br><input type="checkbox"/> Unclear |          |         |

|                                                                                 |                                                                                                                                                                           |                                                                                                            |         |
|---------------------------------------------------------------------------------|---------------------------------------------------------------------------------------------------------------------------------------------------------------------------|------------------------------------------------------------------------------------------------------------|---------|
| 7 sections, 27 topics, and 34 items                                             | Assessment                                                                                                                                                                | Page(s)*                                                                                                   | Note(s) |
| note any differences compared to the source recommendations(s) (if applicable). |                                                                                                                                                                           |                                                                                                            |         |
| <b>Rationale/explanation for recommendations</b>                                |                                                                                                                                                                           |                                                                                                            |         |
| 27                                                                              | Describe the criteria/factors that were considered to formulate the recommendations or note any relevant differences compared to the source guideline(s) (if applicable). | <input type="checkbox"/> Yes<br><input checked="" type="checkbox"/> No<br><input type="checkbox"/> Unclear |         |
| <b>EXTERNAL REVIEW AND QUALITY ASSURANCE</b>                                    |                                                                                                                                                                           |                                                                                                            |         |
| <b>External review</b>                                                          |                                                                                                                                                                           |                                                                                                            |         |
| 28                                                                              | Indicate whether the adapted guideline underwent an independent external review. If yes, describe the process.                                                            | <input checked="" type="checkbox"/> Yes<br><input type="checkbox"/> No<br><input type="checkbox"/> Unclear |         |
| <b>Organizational approval</b>                                                  |                                                                                                                                                                           |                                                                                                            |         |
| 29                                                                              | Indicate whether the adapted guideline obtained organizational approval. If yes, describe the process.                                                                    | <input checked="" type="checkbox"/> Yes<br><input type="checkbox"/> No<br><input type="checkbox"/> Unclear |         |
| <b>FUNDING, DECLARATION, AND MANAGEMENT OF INTEREST</b>                         |                                                                                                                                                                           |                                                                                                            |         |
| <b>Funding source(s) and funder role(s)</b>                                     |                                                                                                                                                                           |                                                                                                            |         |
| 30                                                                              | Report all sources of funding for the adapted guideline and source guideline(s), and the role of the funders.                                                             | <input checked="" type="checkbox"/> Yes<br><input type="checkbox"/> No<br><input type="checkbox"/> Unclear |         |
| <b>Declaration and management of interests</b>                                  |                                                                                                                                                                           |                                                                                                            |         |
| 31                                                                              | Report all conflicts of interest of the adapted and the source guideline(s) panels, and how they were evaluated and managed.                                              | <input checked="" type="checkbox"/> Yes<br><input type="checkbox"/> No<br><input type="checkbox"/> Unclear |         |
| <b>OTHER INFORMATION</b>                                                        |                                                                                                                                                                           |                                                                                                            |         |
| <b>Implementation</b>                                                           |                                                                                                                                                                           |                                                                                                            |         |
| 32                                                                              | Describe the potential barriers and strategies for implementing the recommendations (if applicable).                                                                      | <input checked="" type="checkbox"/> Yes<br><input type="checkbox"/> No<br><input type="checkbox"/> Unclear |         |
| <b>Update</b>                                                                   |                                                                                                                                                                           |                                                                                                            |         |
| 33                                                                              | Briefly describe the strategy for updating the adapted guideline (if applicable).                                                                                         | <input checked="" type="checkbox"/> Yes<br><input type="checkbox"/> No<br><input type="checkbox"/> Unclear |         |
| <b>Limitations and suggestions for further research</b>                         |                                                                                                                                                                           |                                                                                                            |         |
| 34                                                                              | Describe the challenges of the adaptation process, the limitations of the evidence, and provide suggestions for future research.                                          | <input type="checkbox"/> Yes<br><input checked="" type="checkbox"/> No<br><input type="checkbox"/> Unclear | NA      |
